# Supplementary material
Source: publisher site journal article supplement (https://www.dovepress.com/article/311450)
Supplement: Supplementary file 1 [file get_supplementary_file.php]

**Supplementary**

**Table S1:** Annual prevalence (%) of NSAID use in the total population in Denmark, 1999–2019

|  | 1999 | 2000 | 2001 | 2002 | 2003 | 2004 | 2005 | 2006 | 2007 | 2008 | 2009 | 2010 | 2011 | 2012 | 2013 | 2014 | 2015 | 2016 | 2017 | 2018 | 2019 |
| --- | --- | --- | --- | --- | --- | --- | --- | --- | --- | --- | --- | --- | --- | --- | --- | --- | --- | --- | --- | --- | --- |
| **Aspirin (salicylates)** |  |  |  |  |  |  |  |  |  |  |  |  |  |  |  |  |  |  |  |  |  |
| Low-dose aspirin (B01AC06) | 7.05 | 7.25 | 7.19 | 7.37 | 7.46 | 7.62 | 7.75 | 7.94 | 8.17 | 8.46 | 8.51 | 8.43 | 8.33 | 7.96 | 7.57 | 7.09 | 6.63 | 6.16 | 5.81 | 5.54 | 5.31 |
| High-dose, alone (N02BA01) | 0.87 | 0.66 | 0.59 | 0.53 | 0.45 | 0.36 | 0.33 | 0.30 | 0.28 | 0.21 | 0.14 | 0.11 | 0.12 | 0.09 | 0.06 | 0.02 | 0.01 | - | - | - | - |
| High-dose, combinations (N02BA51) | - | - | 4.60 | 6.00 | 4.90 | 4.00 | 4.30 | 2.15 | 2.15 | 2.25 | 2.40 | 2.55 | 2.90 | 2.95 | 3.53 | 1.91 | 1.95 | 2.08 | 2.19 | 2.43 | 2.49 |
| **Non-aspirin NSAIDs** |  |  |  |  |  |  |  |  |  |  |  |  |  |  |  |  |  |  |  |  |  |
| Overall (M01Aa) | 16.06 | 16.53 | 17.36 | 17.98 | 17.88 | 16.65 | 17.01 | 17.17 | 17.06 | 16.98 | 16.37 | 16.55 | 16.80 | 17.29 | 16.95 | 16.64 | 16.98 | 16.83 | 16.02 | 15.45 | 15.60 |
| Butylpyrazolidines (M01AA) | 0.02 | 0.02 | 0.02 | 0.02 | 0.02 | 0.02 | 0.02 | 0.02 | 0.02 | 0.02 | 0.02 | 0.02 | 0.02 | 0.02 | 0.01 | 0.01 | 0.01 | 0.01 | 0.01 | 0.01 | 0.01 |
| Phenylbutazon (M01AA01) | 0.02 | 0.02 | 0.02 | 0.02 | 0.02 | 0.02 | 0.02 | 0.02 | 0.02 | 0.02 | 0.02 | 0.02 | 0.02 | 0.02 | 0.01 | 0.01 | 0.01 | 0.01 | 0.01 | 0.01 | 0.01 |
| Acetic Acids (M01AB) | 5.71 | 5.52 | 5.41 | 5.31 | 5.25 | 5.61 | 5.87 | 5.72 | 5.51 | 5.37 | 3.89 | 3.65 | 3.33 | 2.66 | 2.11 | 1.82 | 1.68 | 1.47 | 1.26 | 1.11 | 1.07 |
| Indometacine M01AB01 | 0.27 | 0.24 | 0.20 | 0.15 | 0.12 | 0.12 | 0.12 | 0.11 | 0.10 | 0.09 | 0.08 | 0.07 | 0.04 | 0.02 | 0.02 | 0.01 | 0.02 | 0.01 | - | - | - |
| Sulindac (M01AB02) | 0.02 | 0.01 | 0.01 | 0.01 | 0.01 | 0.01 | - | - | - | - | - | - | - | - | - | - | - | - | - | - | - |
| Tolmetin (M01AB03) | 0.01 | 0.01 | 0.00 | - | - | - | - | - | - | - | - | - | - | - | - | - | - | - | - | - | - |
| Diclofenac (M01AB05) | 3.98 | 3.98 | 4.06 | 4.00 | 3.99 | 4.23 | 4.32 | 4.25 | 4.14 | 4.26 | 2.88 | 2.74 | 2.52 | 1.99 | 1.57 | 1.37 | 1.28 | 1.17 | 1.05 | 0.94 | 0.91 |
| Etodolac (M01AB08) | 0.70 | 0.73 | 0.70 | 0.87 | 0.91 | 1.11 | 1.18 | 0.99 | 0.92 | 0.94 | 0.82 | 0.69 | 0.61 | 0.52 | 0.42 | 0.34 | 0.29 | 0.21 | 0.15 | 0.12 | 0.11 |
| Ketorolac (M01AB15) | 0.00 | 0.00 | 0.00 | 0.00 | 0.00 | 0.00 | 0.00 | 0.00 | 0.00 | 0.00 | 0.00 | 0.00 | 0.00 | 0.00 | 0.00 | 0.00 | 0.00 | 0.00 | 0.01 | 0.02 | 0.02 |
| Aceclofenac (M01AB16) | 0.17 | 0.13 | 0.10 | 0.07 | 0.05 | 0.04 | 0.02 | 0.01 | - | - | - | - | - | - | - | - | - | - | - | - | - |
| Diclofenac, combinations (M01AB55) | 0.85 | 0.65 | 0.47 | 0.35 | 0.29 | 0.30 | 0.48 | 0.58 | 0.56 | 0.36 | 0.22 | 0.24 | 0.22 | 0.18 | 0.13 | 0.12 | 0.11 | 0.09 | 0.07 | 0.05 | 0.04 |
| Enolic acids (M01AC) | 0.89 | 0.71 | 0.59 | 0.50 | 0.43 | 0.41 | 0.42 | 0.38 | 0.31 | 0.26 | 0.21 | 0.16 | 0.15 | 0.12 | 0.10 | 0.09 | 0.08 | 0.07 | 0.05 | 0.03 | 0.03 |
| Piroxicam (M01AC01) | 0.58 | 0.48 | 0.41 | 0.35 | 0.30 | 0.28 | 0.28 | 0.26 | 0.21 | 0.17 | 0.12 | 0.07 | 0.08 | 0.07 | 0.07 | 0.06 | 0.06 | 0.04 | 0.03 | 0.02 | 0.02 |
| Tenoxicam (M01AC02) | 0.18 | 0.13 | 0.10 | 0.08 | 0.07 | 0.06 | 0.06 | 0.05 | 0.04 | 0.03 | 0.03 | 0.03 | 0.02 | 0.01 | 0.01 | 0.01 | 0.00 | 0.00 | 0.00 | 0.00 | 0.00 |
| Lornoxicam (M01AC05) | 0.01 | 0.03 | 0.03 | 0.03 | 0.03 | 0.03 | 0.04 | 0.04 | 0.04 | 0.03 | 0.04 | 0.04 | 0.02 | 0.02 | 0.01 | 0.01 | 0.01 | 0.01 | 0.01 | 0.00 | 0.00 |
| Meloxicam (M01AC06) | 0.12 | 0.08 | 0.06 | 0.05 | 0.05 | 0.05 | 0.05 | 0.04 | 0.04 | 0.03 | 0.03 | 0.03 | 0.03 | 0.02 | 0.02 | 0.02 | 0.01 | 0.01 | 0.01 | 0.01 | 0.01 |
| Propionic acids (M01AE) | 10.34 | 10.50 | 10.95 | 11.63 | 12.22 | 13.04 | 13.62 | 13.68 | 13.64 | 14.02 | 14.65 | 15.12 | 15.62 | 15.73 | 15.75 | 15.46 | 15.92 | 15.75 | 15.21 | 14.66 | 14.78 |
| Ibuprofen (M01AE01) | 9.30 | 9.65 | 10.18 | 11.02 | 11.61 | 12.47 | 12.87 | 13.00 | 12.96 | 13.28 | 13.92 | 14.32 | 14.91 | 15.07 | 15.07 | 14.73 | 15.20 | 15.17 | 14.43 | 14.04 | 14.21 |
| Naproxen (M01AE02) | 1.06 | 0.99 | 0.88 | 0.82 | 0.76 | 0.72 | 0.69 | 0.61 | 0.57 | 0.61 | 0.79 | 0.68 | 0.69 | 0.73 | 0.81 | 0.82 | 0.85 | 0.90 | 0.90 | 0.91 | 0.86 |
| Ketoprofen (M01AE03) | 0.30 | 0.27 | 0.24 | 0.21 | 0.19 | 0.18 | 0.16 | 0.15 | 0.14 | 0.13 | 0.12 | 0.10 | 0.07 | 0.02 | - | - | - | - | - | - | - |
| Fenoprofen (M01AE04) | 0.01 | 0.01 | 0.00 | 0.00 | 0.00 | - | - | - | - | - | - | - | - | - | - | - | - | - | - | - | - |
| Fenbufen (M01AE05) | 0.00 | 0.00 | - | - | - | - | - | - | - | - | - | - | - | - | - | - | - | - | - | - | - |
| Flurbiprofen (M01AE09) | 0.01 | 0.01 | 0.01 | 0.00 | 0.00 | 0.00 | 0.00 | 0.00 | 0.00 | 0.00 | 0.00 | 0.00 | - | - | - | - | - | - | - | - | - |
| Tiaprofenic acid (M01AE11) | 0.15 | 0.11 | 0.09 | 0.06 | 0.04 | 0.04 | 0.04 | 0.03 | 0.02 | 0.02 | 0.01 | 0.01 | 0.01 | 0.01 | 0.01 | 0.01 | 0.01 | 0.00 | 0.00 | 0.00 | 0.00 |
| Dexibuprofen (M01AE14) | - | - | 0.02 | 0.04 | 0.05 | 0.12 | 0.20 | 0.25 | 0.31 | 0.37 | 0.41 | 0.38 | 0.34 | 0.31 | 0.28 | 0.24 | 0.22 | 0.25 | 0.22 | 0.21 | 0.19 |
| Dexketoprofen (M01AE17) | - | - | - | - | - | - | - | - | - | - | 0.01 | 0.06 | 0.06 | 0.05 | 0.05 | 0.04 | 0.03 | 0.01 | 0.00 | - | - |
| Ibuprofen, combinations (M01AE51) | - | - | - | - | - | - | - | - | - | - | - | - | - | - | - | - | - | - | - | - | 0.00 |
| Naproxen + esomeprazol (M01AE52) | - | - | - | - | - | - | - | - | - | - | - | - | - | 0.00 | 0.01 | 0.01 | 0.01 | 0.01 | - | - | - |
| Fenematic acids (M01AG) | 0.32 | 0.32 | 0.33 | 0.34 | 0.35 | 0.35 | 0.33 | 0.30 | 0.27 | 0.10 | 0.11 | 0.11 | 0.10 | 0.09 | 0.09 | 0.08 | 0.08 | 0.07 | 0.06 | 0.05 | 0.04 |
| Tolfenamic acid (M01AG02) | 0.32 | 0.32 | 0.33 | 0.34 | 0.35 | 0.35 | 0.33 | 0.30 | 0.27 | 0.10 | 0.11 | 0.11 | 0.10 | 0.09 | 0.09 | 0.08 | 0.08 | 0.07 | 0.06 | 0.05 | 0.04 |
| Coxibs (M01AH) | 0.02 | 1.09 | 2.29 | 2.71 | 2.41 | 1.65 | 0.19 | 0.10 | 0.09 | 0.08 | 0.07 | 0.07 | 0.08 | 0.07 | 0.06 | 0.06 | 0.04 | 0.04 | 0.03 | 0.04 | 0.03 |
| Celecoxib (M01AH01) | - | 0.25 | 1.17 | 1.40 | 1.21 | 0.93 | 0.13 | 0.06 | 0.05 | 0.04 | 0.04 | 0.04 | 0.05 | 0.04 | 0.04 | 0.04 | 0.02 | 0.02 | 0.02 | 0.02 | 0.02 |
| Rofecoxib (M01AH02) | 0.02 | 0.88 | 1.24 | 1.42 | 1.16 | 0.61 | - | - | - | - | - | - | - | - | - | - | - | - | - | - | - |
| Parecoxib (M01AH04) | - | - | - | - | 0.00 | - | - | - | - | - | - | - | - | - | - | - | - | - | - | - | - |
| Etoricoxib (M01AH05) | - | - | - | - | 0.16 | 0.24 | 0.07 | 0.04 | 0.04 | 0.04 | 0.03 | 0.03 | 0.03 | 0.02 | 0.02 | 0.02 | 0.02 | 0.02 | 0.01 | 0.02 | 0.02 |
| Lumiracoxib (M01AH06) | - | - | - | - | - | - | - | - | - | - | - | - | - | - | - | - | - | - | - | - | - |
| Nonacidics (M01AX) | 0.16 | 0.11 | 0.08 | 0.06 | 1.46 | 5.33 | 4.03 | 3.43 | 2.97 | 2.93 | 3.12 | 3.17 | 2.81 | 2.00 | 1.79 | 1.79 | 1.85 | 1.61 | 1.53 | 1.53 | 1.50 |
| Nabutamone (M01AX01) | 0.16 | 0.11 | 0.08 | 0.06 | 0.11 | 0.18 | 0.22 | 0.18 | 0.13 | 0.11 | 0.10 | 0.08 | 0.06 | 0.05 | 0.04 | 0.04 | 0.03 | 0.02 | 0.02 | 0.01 | 0.00 |

aM01A except glucosamine (M01AX05). (-) Denotes no sales or no available data. COX: Cyclooxygenase; NSAID: non-steroidal anti-inflammatory drug.

**Table S2:** The proportion of total NSAID use in the hospital sector in Denmark, 1999–2019

|  | 1999 | 2000 | 2001 | 2002 | 2003 | 2004 | 2005 | 2006 | 2007 | 2008 | 2009 | 2010 | 2011 | 2012 | 2013 | 2014 | 2015 | 2016 | 2017 | 2018 | 2019 |
| --- | --- | --- | --- | --- | --- | --- | --- | --- | --- | --- | --- | --- | --- | --- | --- | --- | --- | --- | --- | --- | --- |
| **Aspirin (salicylates)** |  |  |  |  |  |  |  |  |  |  |  |  |  |  |  |  |  |  |  |  |  |
| Low-dose aspirin (B01AC06) | 1.38 | 1.40 | 1.39 | 1.39 | 1.29 | 1.25 | 1.28 | 1.25 | 1.24 | 1.22 | 1.21 | 1.19 | 1.10 | 1.16 | 1.19 | 1.23 | 1.17 | 1.21 | 1.36 | 1.39 | 1.45 |
| High-dose, alone (N02BA01) | 0.83 | 1.06 | 1.03 | 1.05 | 1.13 | 1.17 | 1.08 | 0.96 | 0.95 | 1.14 | 0.73 | 0.45 | 0.00 | 0.00 | 0.00 | 0.00 | 0.00 | - | - | - | - |
| High-dose, combinations (N02BA51) | 0.03 | 0.02 | 0.02 | 0.02 | 0.02 | 0.02 | 0.02 | 0.02 | 0.02 | 0.02 | 0.02 | 0.02 | 0.02 | 0.02 | 0.03 | 0.04 | 0.03 | 0.03 | 0.03 | 0.05 | 0.04 |
| **Non-aspirin NSAIDs** |  |  |  |  |  |  |  |  |  |  |  |  |  |  |  |  |  |  |  |  |  |
| Overall (M01Aa) | 2.78 | 3.04 | 3.10 | 3.14 | 3.10 | 3.06 | 2.96 | 2.92 | 2.90 | 2.86 | 2.90 | 2.69 | 2.50 | 2.44 | 2.45 | 2.83 | 2.58 | 2.50 | 2.58 | 2.58 | 2.62 |
| Butylpyrazolidines (M01AA) | 0.00 | 0.00 | 0.00 | 0.00 | 0.00 | 0.00 | 0.00 | 0.00 | - | 0.00 | 0.00 | 0.00 | 0.00 | 0.00 | 0.00 | 0.00 | - | 0.00 | 0.00 | 0.00 | 0.00 |
| Phenylbutazon (M01AA01) | 0.00 | 0.00 | 0.00 | 0.00 | 0.00 | 0.00 | 0.00 | 0.00 | - | 0.00 | 0.00 | 0.00 | 0.00 | 0.00 | 0.00 | 0.00 | - | 0.00 | 0.00 | 0.00 | 0.00 |
| Acetic Acids (M01AB) | 3.39 | 3.97 | 3.91 | 4.00 | 4.00 | 3.77 | 3.55 | 3.60 | 3.72 | 3.59 | 3.20 | 2.56 | 2.10 | 2.10 | 2.14 | 2.58 | 2.61 | 3.11 | 3.85 | 4.60 | 5.22 |
| Indometacine M01AB01 | 3.62 | 4.32 | 4.26 | 6.01 | 6.64 | 7.03 | 6.19 | 5.90 | 4.45 | 4.84 | 7.05 | 3.48 | 4.21 | 13.89 | 20.83 | 18.75 | 19.23 | 27.27 | - | - | - |
| Sulindac (M01AB02) | 1.20 | 1.47 | 1.61 | 1.85 | 0.00 | 2.63 | - | - | - | - | - | - | - | - | - | - | - | - | - | - | - |
| Tolmetin (M01AB03) | 0.00 | 0.00 | 0.00 | - | - | - | - | - | - | - | - | - | - | - | - | - | - | - | - | - | - |
| Diclofenac (M01AB05) | 3.87 | 4.42 | 4.37 | 4.36 | 4.30 | 4.13 | 4.40 | 4.50 | 4.60 | 4.19 | 3.56 | 2.64 | 2.08 | 1.99 | 1.93 | 2.34 | 2.15 | 2.17 | 2.66 | 3.13 | 3.54 |
| Etodolac (M01AB08) | 0.78 | 0.90 | 0.96 | 1.72 | 2.20 | 1.92 | 1.27 | 0.97 | 1.34 | 1.41 | 1.11 | 0.94 | 0.63 | 0.46 | 0.38 | 0.49 | 0.52 | 0.81 | 1.51 | 2.19 | 2.70 |
| Ketorolac (M01AB15) | 92.2 | 96.7 | 97.0 | 98.7 | 97.4 | 97.5 | 96.7 | 95.7 | 94.0 | 93.1 | 93.8 | 93.5 | 93.1 | 94.2 | 94.9 | 90.7 | 89.0 | 89.9 | 82.5 | 76.8 | 77.9 |
| Aceclofenac (M01AB16) | 0.18 | 0.20 | 0.24 | 0.00 | 0.00 | 0.00 | 0.00 | 0.00 | - | - | - | - | - | - | - | - | - | - | - | - | - |
| Diclofenac, combinations (M01AB55) | 3.27 | 4.07 | 3.30 | 2.57 | 2.14 | 1.94 | 2.07 | 2.47 | 1.80 | 1.07 | 0.80 | 0.82 | 0.27 | 0.19 | 0.23 | 0.13 | 0.13 | 0.16 | 0.19 | 0.00 | 0.00 |
| Enolic acids (M01AC) | 4.42 | 5.25 | 7.47 | 8.38 | 7.76 | 7.57 | 5.98 | 5.70 | 5.69 | 6.37 | 6.73 | 6.34 | 5.04 | 2.80 | 2.26 | 1.84 | 1.16 | 1.42 | 1.79 | 1.90 | 1.95 |
| Piroxicam (M01AC01) | 3.78 | 3.67 | 4.04 | 3.97 | 2.70 | 2.36 | 1.96 | 1.72 | 1.31 | 0.22 | 0.31 | 0.24 | 0.25 | 0.53 | 0.58 | 0.32 | 0.36 | 0.43 | 0.56 | 0.71 | 0.00 |
| Tenoxicam (M01AC02) | 5.71 | 4.65 | 4.62 | 4.20 | 4.10 | 5.31 | 4.31 | 4.39 | 3.92 | 5.46 | 5.24 | 3.02 | 3.91 | 0.00 | 0.00 | 0.00 | 0.00 | 0.00 | 0.00 | 0.00 | 0.00 |
| Lornoxicam (M01AC05) | 62.9 | 61.5 | 71.4 | 71.6 | 70.7 | 68.7 | 56.1 | 53.9 | 52.1 | 55.9 | 45.6 | 36.7 | 32.5 | 23.1 | 18.9 | 15.4 | 9.43 | 9.43 | 10.0 | 14.8 | 66.7 |
| Meloxicam (M01AC06) | 0.67 | 0.57 | 0.36 | 0.40 | 0.41 | 0.41 | 0.63 | 0.34 | 0.36 | 0.81 | 1.69 | 0.84 | 0.48 | 0.00 | 0.60 | 0.00 | 0.00 | 0.00 | 0.00 | 0.00 | 0.00 |
| Propionic acids (M01AE) | 2.40 | 2.54 | 2.54 | 2.39 | 2.41 | 2.38 | 2.44 | 2.32 | 2.29 | 2.30 | 2.61 | 2.60 | 2.51 | 2.44 | 2.42 | 2.77 | 2.47 | 2.29 | 2.31 | 2.22 | 2.21 |
| Ibuprofen (M01AE01) | 2.41 | 2.46 | 2.44 | 2.24 | 2.26 | 2.23 | 2.34 | 2.28 | 2.23 | 2.27 | 2.60 | 2.56 | 2.49 | 2.40 | 2.43 | 2.80 | 2.46 | 2.27 | 2.34 | 2.27 | 2.27 |
| Naproxen (M01AE02) | 2.40 | 3.00 | 3.12 | 3.25 | 3.50 | 3.89 | 4.03 | 3.32 | 3.61 | 3.35 | 3.86 | 4.41 | 4.02 | 3.77 | 3.04 | 3.17 | 3.23 | 3.13 | 2.51 | 2.22 | 2.03 |
| Ketoprofen (M01AE03) | 3.25 | 3.74 | 3.78 | 4.38 | 3.92 | 3.43 | 3.07 | 2.97 | 3.03 | 2.49 | 1.09 | 0.50 | 0.18 | 0.00 | - | - | - | - | - | - | - |
| Fenoprofen (M01AE04) | 0.00 | 0.00 | 0.00 | 0.00 | 0.00 | - | - | - | - | - | - | - | - | - | - | - | - | - | - | - | - |
| Fenbufen (M01AE05) | - | 0.00 | - | - | - | - | - | - | - | - | - | - | - | - | - | - | - | - | - | - | - |
| Flurbiprofen (M01AE09) | 0.00 | 0.00 | 0.00 | 0.00 | 0.00 | 0.00 | 0.00 | 0.00 | 0.00 | 0.00 | 0.00 | 0.00 | - | - | - | - | - | - | - | - | - |
| Tiaprofenic acid (M01AE11) | 0.42 | 0.34 | 0.21 | 0.26 | 0.00 | 0.00 | 0.00 | 0.00 | 0.00 | 0.00 | 0.00 | 0.00 | 0.00 | 0.00 | 0.00 | 0.00 | 0.00 | 0.00 | 0.00 | 0.00 | 0.00 |
| Dexibuprofen (M01AE14) | - | - | 0.00 | 0.00 | 0.00 | 0.00 | 0.16 | 0.26 | 0.41 | 0.78 | 0.59 | 0.44 | 0.22 | 0.23 | 0.24 | 0.09 | 0.09 | 0.09 | 0.09 | 0.09 | 0.10 |
| Dexketoprofen (M01AE17) | - | - | - | - | - | - | - | - | - | - | 0.00 | 1.47 | 1.20 | 1.37 | 1.32 | 2.67 | 1.61 | 0.00 | - | - | - |
| Ibuprofen, combinations (M01AE51) | - | - | - | - | - | - | - | - | - | - | - | - | - | - | - | - | - | - | - | - | 0.00 |
| Naproxen + esomeprazol (M01AE52) | - | - | - | - | - | - | - | - | - | - | - | - | - | 0.00 | 0.00 | 0.00 | 0.00 | 0.00 | - | - | - |
| Fenematic acids (M01AG) | 0.47 | 0.45 | 0.33 | 0.51 | 0.28 | 0.18 | 0.21 | 0.15 | 0.17 | 0.00 | 0.00 | 0.00 | 0.00 | 0.00 | 0.00 | 0.00 | 0.00 | 0.00 | 0.00 | 0.00 | 0.00 |
| Tolfenamic acid (M01AG02) | 0.47 | 0.45 | 0.33 | 0.51 | 0.28 | 0.18 | 0.21 | 0.15 | 0.17 | 0.00 | 0.00 | 0.00 | 0.00 | 0.00 | 0.00 | 0.00 | 0.00 | 0.00 | 0.00 | 0.00 | 0.00 |
| Coxibs (M01AH) | 6.67 | 2.36 | 2.97 | 3.43 | 3.43 | 3.70 | 6.19 | 10.5 | 9.47 | 9.62 | 8.61 | 8.09 | 8.46 | 11.5 | 13.2 | 20.3 | 27.6 | 29.0 | 29.3 | 34.5 | 36.9 |
| Celecoxib (M01AH01) | - | 2.93 | 3.15 | 3.19 | 3.82 | 4.63 | 7.96 | 14.1 | 12.8 | 13.7 | 11.4 | 10.1 | 10.0 | 12.7 | 15.2 | 22.8 | 32.1 | 31.9 | 31.2 | 37.9 | 40.0 |
| Rofecoxib (M01AH02) | 6.67 | 2.20 | 2.77 | 3.73 | 3.07 | 2.54 | - | - | - | - | - | - | - | - | - | - | - | - | - | - | - |
| Parecoxib (M01AH04) | - | - | - | 50.0 | 100 | 100 | 100 | 100 | 0.00 | - | 100 | - | - | - | - | - | - | - | - | - | - |
| Etoricoxib (M01AH05) | - | - | - | - | 0.00 | 0.18 | 0.65 | 0.51 | 0.00 | 0.00 | 0.00 | 0.00 | 1.09 | 2.60 | 1.47 | 7.25 | 10.9 | 16.7 | 20.3 | 20.6 | 27.3 |
| Lumiracoxib (M01AH06) | 0.00 | 0.00 | 0.00 | 0.00 | 0.00 | 0.00 | 0.00 | 0.00 | 0.00 | - | - | 0.00 | - | - | - | - | - | - | - | - | - |
| Nonacidics (M01AX) | 2.62 | 2.50 | 1.61 | 1.51 | 0.13 | 0.09 | 0.16 | 0.19 | 0.17 | 0.17 | 0.16 | 0.11 | 0.08 | 0.09 | 0.06 | 0.05 | 0.04 | 0.03 | 0.03 | 0.02 | 0.02 |
| Nabutamone (M01AX01) | 2.62 | 2.50 | 1.61 | 1.51 | 0.99 | 0.98 | 1.20 | 1.09 | 0.69 | 0.54 | 0.61 | 0.71 | 0.96 | 0.73 | 0.63 | 0.79 | 0.63 | 0.46 | 0.61 | 0.00 | 0.00 |

aM01A except glucosamine (M01AX05). (-) Denotes no sales or no available data. COX: Cyclooxygenase; NSAID: non-steroidal anti-inflammatory drug.

**Table S3:** Annual prevalence (%) of NSAID use misclassified from hospital sector use, 1999–2019

|  | 1999 | 2000 | 2001 | 2002 | 2003 | 2004 | 2005 | 2006 | 2007 | 2008 | 2009 | 2010 | 2011 | 2012 | 2013 | 2014 | 2015 | 2016 | 2017 | 2018 | 2019 |
| --- | --- | --- | --- | --- | --- | --- | --- | --- | --- | --- | --- | --- | --- | --- | --- | --- | --- | --- | --- | --- | --- |
| **Aspirin (salicylates)** |  |  |  |  |  |  |  |  |  |  |  |  |  |  |  |  |  |  |  |  |  |
| Low-dose aspirin (B01AC06) | 0.10 | 0.10 | 0.10 | 0.10 | 0.10 | 0.10 | 0.10 | 0.10 | 0.10 | 0.10 | 0.10 | 0.10 | 0.09 | 0.09 | 0.09 | 0.09 | 0.08 | 0.07 | 0.08 | 0.08 | 0.08 |
| High-dose, alone (N02BA01) | 0.01 | 0.01 | 0.01 | 0.01 | 0.01 | 0.00 | 0.00 | 0.00 | 0.00 | 0.00 | 0.00 | 0.00 | 0.00 | 0.00 | 0.00 | 0.00 | 0.00 | - | - | - | - |
| High-dose, combinations (N02BA51) | - | - | 0.00 | 0.00 | 0.00 | 0.00 | 0.00 | 0.00 | 0.00 | 0.00 | 0.00 | 0.00 | 0.00 | 0.00 | 0.00 | 0.00 | 0.00 | 0.00 | 0.00 | 0.00 | 0.00 |
| **Non-aspirin NSAIDs** |  |  |  |  |  |  |  |  |  |  |  |  |  |  |  |  |  |  |  |  |  |
| Overall (M01Aa) | 0.45 | 0.50 | 0.54 | 0.56 | 0.55 | 0.51 | 0.50 | 0.50 | 0.49 | 0.49 | 0.47 | 0.45 | 0.42 | 0.42 | 0.41 | 0.47 | 0.44 | 0.42 | 0.41 | 0.40 | 0.41 |
| Butylpyrazolidines (M01AA) | 0.00 | 0.00 | 0.00 | 0.00 | 0.00 | 0.00 | 0.00 | 0.00 | - | 0.00 | 0.00 | 0.00 | 0.00 | 0.00 | 0.00 | 0.00 | - | 0.00 | 0.00 | 0.00 | 0.00 |
| Phenylbutazon (M01AA01) | 0.00 | 0.00 | 0.00 | 0.00 | 0.00 | 0.00 | 0.00 | 0.00 | - | 0.00 | 0.00 | 0.00 | 0.00 | 0.00 | 0.00 | 0.00 | - | 0.00 | 0.00 | 0.00 | 0.00 |
| Acetic Acids (M01AB) | 0.19 | 0.22 | 0.21 | 0.21 | 0.21 | 0.21 | 0.21 | 0.21 | 0.21 | 0.19 | 0.12 | 0.09 | 0.07 | 0.06 | 0.05 | 0.05 | 0.04 | 0.05 | 0.05 | 0.05 | 0.06 |
| Indometacine M01AB01 | 0.01 | 0.01 | 0.01 | 0.01 | 0.01 | 0.01 | 0.01 | 0.01 | 0.00 | 0.00 | 0.01 | 0.00 | 0.00 | 0.00 | 0.00 | 0.00 | 0.00 | 0.00 | - | - | - |
| Sulindac (M01AB02) | 0.00 | 0.00 | 0.00 | 0.00 | 0.00 | 0.00 | - | - | - | - | - | - | - | - | - | - | - | - | - | - | - |
| Tolmetin (M01AB03) | 0.00 | 0.00 | 0.00 | - | - | - | - | - | - | - | - | - | - | - | - | - | - | - | - | - | - |
| Diclofenac (M01AB05) | 0.15 | 0.18 | 0.18 | 0.17 | 0.17 | 0.17 | 0.19 | 0.19 | 0.19 | 0.18 | 0.10 | 0.07 | 0.05 | 0.04 | 0.03 | 0.03 | 0.03 | 0.03 | 0.03 | 0.03 | 0.03 |
| Etodolac (M01AB08) | 0.01 | 0.01 | 0.01 | 0.01 | 0.02 | 0.02 | 0.01 | 0.01 | 0.01 | 0.01 | 0.01 | 0.01 | 0.00 | 0.00 | 0.00 | 0.00 | 0.00 | 0.00 | 0.00 | 0.00 | 0.00 |
| Ketorolac (M01AB15) | 0.00 | 0.00 | 0.00 | 0.00 | 0.00 | 0.00 | 0.00 | 0.00 | 0.00 | 0.00 | 0.00 | 0.00 | 0.00 | 0.00 | 0.00 | 0.00 | 0.00 | 0.00 | 0.01 | 0.02 | 0.01 |
| Aceclofenac (M01AB16) | 0.00 | 0.00 | 0.00 | 0.00 | 0.00 | 0.00 | 0.00 | 0.00 | - | - | - | - | - | - | - | - | - | - | - | - | - |
| Diclofenac, combinations (M01AB55) | 0.03 | 0.03 | 0.02 | 0.01 | 0.01 | 0.01 | 0.01 | 0.01 | 0.01 | 0.00 | 0.00 | 0.00 | 0.00 | 0.00 | 0.00 | 0.00 | 0.00 | 0.00 | 0.00 | 0.00 | 0.00 |
| Enolic acids (M01AC) | 0.04 | 0.04 | 0.04 | 0.04 | 0.03 | 0.03 | 0.02 | 0.02 | 0.02 | 0.02 | 0.01 | 0.01 | 0.01 | 0.00 | 0.00 | 0.00 | 0.00 | 0.00 | 0.00 | 0.00 | 0.00 |
| Piroxicam (M01AC01) | 0.02 | 0.02 | 0.02 | 0.01 | 0.01 | 0.01 | 0.01 | 0.00 | 0.00 | 0.00 | 0.00 | 0.00 | 0.00 | 0.00 | 0.00 | 0.00 | 0.00 | 0.00 | 0.00 | 0.00 | 0.00 |
| Tenoxicam (M01AC02) | 0.01 | 0.01 | 0.00 | 0.00 | 0.00 | 0.00 | 0.00 | 0.00 | 0.00 | 0.00 | 0.00 | 0.00 | 0.00 | 0.00 | 0.00 | 0.00 | 0.00 | 0.00 | 0.00 | 0.00 | 0.00 |
| Lornoxicam (M01AC05) | 0.01 | 0.02 | 0.02 | 0.02 | 0.02 | 0.02 | 0.02 | 0.02 | 0.02 | 0.02 | 0.02 | 0.01 | 0.01 | 0.00 | 0.00 | 0.00 | 0.00 | 0.00 | 0.00 | 0.00 | 0.00 |
| Meloxicam (M01AC06) | 0.00 | 0.00 | 0.00 | 0.00 | 0.00 | 0.00 | 0.00 | 0.00 | 0.00 | 0.00 | 0.00 | 0.00 | 0.00 | 0.00 | 0.00 | 0.00 | 0.00 | 0.00 | 0.00 | 0.00 | 0.00 |
| Propionic acids (M01AE) | 0.25 | 0.27 | 0.28 | 0.28 | 0.29 | 0.31 | 0.33 | 0.32 | 0.31 | 0.32 | 0.38 | 0.39 | 0.39 | 0.38 | 0.38 | 0.43 | 0.39 | 0.36 | 0.35 | 0.33 | 0.33 |
| Ibuprofen (M01AE01) | 0.22 | 0.24 | 0.25 | 0.25 | 0.26 | 0.28 | 0.30 | 0.30 | 0.29 | 0.30 | 0.36 | 0.37 | 0.37 | 0.36 | 0.37 | 0.41 | 0.37 | 0.34 | 0.34 | 0.32 | 0.32 |
| Naproxen (M01AE02) | 0.03 | 0.03 | 0.03 | 0.03 | 0.03 | 0.03 | 0.03 | 0.02 | 0.02 | 0.02 | 0.03 | 0.03 | 0.03 | 0.03 | 0.02 | 0.03 | 0.03 | 0.03 | 0.02 | 0.02 | 0.02 |
| Ketoprofen (M01AE03) | 0.01 | 0.01 | 0.01 | 0.01 | 0.01 | 0.01 | 0.00 | 0.00 | 0.00 | 0.00 | 0.00 | 0.00 | 0.00 | 0.00 | - | - | - | - | - | - | - |
| Fenoprofen (M01AE04) | 0.00 | 0.00 | 0.00 | 0.00 | 0.00 | - | - | - | - | - | - | - | - | - | - | - | - | - | - | - | - |
| Fenbufen (M01AE05) | - | 0.00 | - | - | - | - | - | - | - | - | - | - | - | - | - | - | - | - | - | - | - |
| Flurbiprofen (M01AE09) | 0.00 | 0.00 | 0.00 | 0.00 | 0.00 | 0.00 | 0.00 | 0.00 | 0.00 | 0.00 | 0.00 | 0.00 | - | - | - | - | - | - | - | - | - |
| Tiaprofenic acid (M01AE11) | 0.00 | 0.00 | 0.00 | 0.00 | 0.00 | 0.00 | 0.00 | 0.00 | 0.00 | 0.00 | 0.00 | 0.00 | 0.00 | 0.00 | 0.00 | 0.00 | 0.00 | 0.00 | 0.00 | 0.00 | 0.00 |
| Dexibuprofen (M01AE14) | - | - | 0.00 | 0.00 | 0.00 | 0.00 | 0.00 | 0.00 | 0.00 | 0.00 | 0.00 | 0.00 | 0.00 | 0.00 | 0.00 | 0.00 | 0.00 | 0.00 | 0.00 | 0.00 | 0.00 |
| Dexketoprofen (M01AE17) | - | - | - | - | - | - | - | - | - | - | 0.00 | 0.00 | 0.00 | 0.00 | 0.00 | 0.00 | 0.00 | 0.00 | - | - | - |
| Ibuprofen, combinations (M01AE51) | - | - | - | - | - | - | - | - | - | - | - | - | - | - | - | - | - | - | - | - | 0.00 |
| Naproxen + esomeprazol (M01AE52) | - | - | - | - | - | - | - | - | - | - | - | - | - | 0.00 | 0.00 | 0.00 | 0.00 | 0.00 | - | - | - |
| Fenematic acids (M01AG) | 0.00 | 0.00 | 0.00 | 0.00 | 0.00 | 0.00 | 0.00 | 0.00 | 0.00 | 0.00 | 0.00 | 0.00 | 0.00 | 0.00 | 0.00 | 0.00 | 0.00 | 0.00 | 0.00 | 0.00 | 0.00 |
| Tolfenamic acid (M01AG02) | 0.00 | 0.00 | 0.00 | 0.00 | 0.00 | 0.00 | 0.00 | 0.00 | 0.00 | 0.00 | 0.00 | 0.00 | 0.00 | 0.00 | 0.00 | 0.00 | 0.00 | 0.00 | 0.00 | 0.00 | 0.00 |
| Coxibs (M01AH) | 0.00 | 0.03 | 0.07 | 0.09 | 0.08 | 0.06 | 0.01 | 0.01 | 0.01 | 0.01 | 0.01 | 0.01 | 0.01 | 0.01 | 0.01 | 0.01 | 0.01 | 0.01 | 0.01 | 0.01 | 0.01 |
| Celecoxib (M01AH01) | - | 0.01 | 0.04 | 0.04 | 0.05 | 0.04 | 0.01 | 0.01 | 0.01 | 0.01 | 0.00 | 0.00 | 0.00 | 0.01 | 0.01 | 0.01 | 0.01 | 0.01 | 0.01 | 0.01 | 0.01 |
| Rofecoxib (M01AH02) | 0.00 | 0.02 | 0.03 | 0.05 | 0.04 | 0.02 | - | - | - | - | - | - | - | - | - | - | - | - | - | - | - |
| Parecoxib (M01AH04) | - | - | - | - | 0.00 | - | - | - | - | - | - | - | - | - | - | - | - | - | - | - | - |
| Etoricoxib (M01AH05) | - | - | - | - | 0.00 | 0.00 | 0.00 | 0.00 | 0.00 | 0.00 | 0.00 | 0.00 | 0.00 | 0.00 | 0.00 | 0.00 | 0.00 | 0.00 | 0.00 | 0.00 | 0.00 |
| Lumiracoxib (M01AH06) | - | - | - | - | - | - | - | - | - | - | - | - | - | - | - | - | - | - | - | - | - |
| Nonacidics (M01AX) | 0.00 | 0.00 | 0.00 | 0.00 | 0.00 | 0.00 | 0.01 | 0.01 | 0.01 | 0.00 | 0.01 | 0.00 | 0.00 | 0.00 | 0.00 | 0.00 | 0.00 | 0.00 | 0.00 | 0.00 | 0.00 |
| Nabutamone (M01AX01) | 0.00 | 0.00 | 0.00 | 0.00 | 0.00 | 0.00 | 0.00 | 0.00 | 0.00 | 0.00 | 0.00 | 0.00 | 0.00 | 0.00 | 0.00 | 0.00 | 0.00 | 0.00 | 0.00 | 0.00 | 0.00 |

aM01A except glucosamine (M01AX05). (-) Denotes no sales or no available data. COX: Cyclooxygenase; NSAID: non-steroidal anti-inflammatory drug

**Table S4:** The proportion of total NSAID on prescription in Denmark, 1999–2019

|  | 1999 | 2000 | 2001 | 2002 | 2003 | 2004 | 2005 | 2006 | 2007 | 2008 | 2009 | 2010 | 2011 | 2012 | 2013 | 2014 | 2015 | 2016 | 2017 | 2018 | 2019 |
| --- | --- | --- | --- | --- | --- | --- | --- | --- | --- | --- | --- | --- | --- | --- | --- | --- | --- | --- | --- | --- | --- |
| **Aspirin (salicylates)** |  |  |  |  |  |  |  |  |  |  |  |  |  |  |  |  |  |  |  |  |  |
| Low-dose aspirin (B01AC06) | 62 | 63 | 71 | 77 | 82 | 85 | 87 | 89 | 90 | 90 | 90 | 91 | 91 | 92 | 91 | 91 | 91 | 91 | 91 | 90 | 89 |
| High-dose, alone (N02BA01) | 7 | 7 | 7 | 8 | 8 | 9 | 9 | 9 | 9 | 9 | 10 | 10 | 9 | 10 | 17 | 99 | 98 | - | - | - | - |
| High-dose, combinations (N02BA51) | <1 | <1 | 1 | 1 | 1 | 1 | 1 | 2 | 2 | 2 | 2 | 2 | 2 | 2 | 4 | 11 | 10 | 9 | 8 | 7 | 7 |
| **Non-aspirin NSAIDs** |  |  |  |  |  |  |  |  |  |  |  |  |  |  |  |  |  |  |  |  |  |
| Overall (M01Aa) | 85 | 84 | 85 | 85 | 85 | 84 | 83 | 82 | 82 | 81 | 80 | 79 | 77 | 75 | 75 | 84 | 83 | 83 | 81 | 80 | 78 |
| Butylpyrazolidines (M01AA) | 97 | 95 | 95 | 96 | 98 | 97 | 99 | 99 | 99 | 100 | 99 | 100 | 100 | 100 | 100 | 99 | 100 | 100 | 100 | 100 | 99 |
| Phenylbutazon (M01AA01) | 97 | 95 | 95 | 96 | 98 | 97 | 99 | 99 | 99 | 100 | 99 | 100 | 100 | 100 | 100 | 99 | 100 | 100 | 100 | 100 | 99 |
| Acetic Acids (M01AB) | 99 | 99 | 98 | 98 | 98 | 99 | 99 | 99 | 99 | 98 | 99 | 99 | 99 | 99 | 99 | 99 | 99 | 99 | 99 | 99 | 98 |
| Indometacine M01AB01 | 99 | 98 | 99 | 98 | 97 | 99 | 99 | 99 | 99 | 100 | 100 | 100 | 100 | 99 | 99 | 100 | 99 | 99 | - | - | - |
| Sulindac (M01AB02) | 100 | 100 | 100 | 100 | 100 | 100 | - | - | - | - | - | - | - | - | - | - | - | - | - | - | - |
| Tolmetin (M01AB03) | 100 | 100 | 100 | - | - | - | - | - | - | - | - | - | - | - | - | - | - | - | - | - | - |
| Diclofenac (M01AB05) | 98 | 98 | 98 | 98 | 98 | 98 | 98 | 98 | 98 | 97 | 98 | 99 | 99 | 99 | 99 | 99 | 99 | 99 | 99 | 99 | 99 |
| Etodolac (M01AB08) | 100 | 100 | 100 | 100 | 100 | 100 | 100 | 100 | 100 | 100 | 100 | 100 | 100 | 100 | 100 | 100 | 100 | 100 | 100 | 100 | 100 |
| Ketorolac (M01AB15) | 19 | 35 | 14 | 13 | 37 | 37 | 42 | 33 | 3 | 3 | 5 | 4 | 3 | 2 | 10 | 2 | 4 | 6 | 7 | 9 | 11 |
| Aceclofenac (M01AB16) | 100 | 100 | 100 | 100 | 100 | 100 | 100 | 100 | 0 | 0 | 0 | 0 | 0 | 0 | 0 | 0 | 0 | 0 | 0 | 0 | 0 |
| Diclofenac, combinations (M01AB55) | 99 | 99 | 99% | 99 | 99 | 99 | 99 | 99 | 99 | 99 | 100 | 100 | 100 | 100 | 100 | 100 | 100 | 100 | 100 | 100 | 100 |
| Enolic acids (M01AC) | 98 | 98 | 98 | 98 | 98 | 97 | 97 | 97 | 98 | 99 | 98 | 99 | 99 | 99 | 99 | 99 | 99 | 98 | 98 | 98 | 98 |
| Piroxicam (M01AC01) | 98 | 97 | 97 | 97 | 97 | 97 | 97 | 98 | 99 | 99 | 98 | 99 | 99 | 99 | 98 | 99 | 98 | 99 | 99 | 99 | 99 |
| Tenoxicam (M01AC02) | 100 | 100 | 100 | 100 | 100 | 100 | 100 | 99 | 99 | 99 | 99 | 99 | 99 | 100 | 100 | 100 | 100 | 100 | 100 | 100 | 100 |
| Lornoxicam (M01AC05) | 96 | 78 | 93 | 90 | 92 | 89 | 72 | 68 | 71 | 92 | 89 | 94 | 96 | 97 | 98 | 96 | 98 | 94 | 89 | 89 | 4 |
| Meloxicam (M01AC06) | 100 | 100 | 99 | 99 | 99 | 99 | 100 | 100 | 100 | 100 | 100 | 100 | 99 | 100 | 99 | 99 | 99 | 99 | 99 | 99 | 99 |
| Propionic acids (M01AE) | 76 | 74 | 73 | 72 | 71 | 71 | 72 | 72 | 72 | 72 | 73 | 72 | 70 | 69 | 70 | 81 | 80 | 81 | 79 | 78 | 77 |
| Ibuprofen (M01AE01) | 70 | 68 | 68 | 67 | 67 | 67 | 69 | 69 | 69 | 69 | 69 | 69 | 67 | 66 | 67 | 79 | 78 | 78 | 77 | 75 | 74 |
| Naproxen (M01AE02) | 99 | 98 | 98 | 99 | 98 | 99 | 99 | 99 | 99 | 99 | 99 | 99 | 99 | 99 | 99 | 99 | 99 | 99 | 99 | 99 | 99 |
| Ketoprofen (M01AE03) | 99 | 99 | 99 | 99 | 99 | 99 | 99 | 99 | 99 | 99 | 99 | 100 | 100 | 100 | 0 | 0 | 0 | 0 | 0 | 0 | 0 |
| Fenoprofen (M01AE04) | 100 | 100 | 100 | 100 | 100 | 0 | 0 | 0 | 0 | 0 | 0 | 0 | 0 | 0 | 0 | 0 | 0 | 0 | 0 | 0 | 0 |
| Fenbufen (M01AE05) | 100 | 100 | 0 | 0 | 0 | 0 | 0 | 0 | 0 | 0 | 0 | 0 | 0 | 0 | 0 | 0 | 0 | 0 | 0 | 0 | 0 |
| Flurbiprofen (M01AE09) | 100 | 100 | 100 | 100 | 99 | 100 | 100 | 100 | 100 | 100 | 100 | 100 | - | - | - | - | - | - | - | - | - |
| Tiaprofenic acid (M01AE11) | 100 | 100 | 100 | 100 | 100 | 100 | 100 | 100 | 100 | 100 | 100 | 100 | 100 | 100 | 100 | 100 | 100 | 100 | 100 | 100 | 100 |
| Dexibuprofen (M01AE14) | - | - | 100 | 100 | 97 | 99 | 100 | 100 | 99 | 98 | 98 | 99 | 99 | 99 | 99 | 99 | 99 | 99 | 99 | 99 | 99 |
| Dexketoprofen (M01AE17) | - | - | - | - | - | - | - | - | - | - | 97 | 98 | 100 | 100 | 99 | 99 | 100 | 100 | 100 | - | - |
| Ibuprofen, combinations (M01AE51) | - | - | - | - | - | - | - | - | - | - | - | - | - | - | - | - | - | - | - | - | 80 |
| Naproxen + esomeprazol (M01AE52) | - | - | - | - | - | - | - | - | - | - | - | - | - | 99 | 100 | 99 | 100 | 100 | - | - | - |
| Fenematic acids (M01AG) | 99 | 99 | 99 | 99 | 99 | 99 | 99 | 99 | 100 | 100 | 99 | 99 | 100 | 100 | 100 | 100 | 100 | 100 | 100 | 100 | 100 |
| Tolfenamic acid (M01AG02) | 99 | 99 | 99 | 99 | 99 | 99 | 99 | 99 | 100 | 100 | 99 | 99 | 100 | 100 | 100 | 100 | 100 | 100 | 100 | 100 | 100 |
| Coxibs (M01AH) | 97 | 100 | 99 | 99 | 99 | 99 | 98 | 98 | 90 | 94 | 99 | 99 | 99 | 99 | 99 | 99 | 99 | 99 | 100 | 99 | 99 |
| Celecoxib (M01AH01) | - | 99 | 100 | 100 | 99 | 100 | 97 | 98 | 85 | 92 | 99 | 99 | 99 | 99 | 99 | 99 | 99 | 99 | 100 | 100 | 100 |
| Rofecoxib (M01AH02) | 100 | 100 | 99 | 99 | 98 | 99 | - | - | - | - | - | - | - | - | - | - | - | - | - | - | - |
| Parecoxib (M01AH04) | - | - | - | - | 2 | - | - | - | - | - | - | - | - | - | - | - | - | - | - | - | - |
| Etoricoxib (M01AH05) | - | - | - | - | 100 | 100 | 100 | 100 | 100 | 100 | 99 | 99 | 99 | 99 | 99 | 99 | 99 | 99 | 99 | 98 | 99 |
| Lumiracoxib (M01AH06) | - | - | - | - | - | - | - | - | - | - | - | - | - | - | - | - | - | - | - | - | - |
| Nonacidics (M01AX) | 100 | 100 | 100 | 100 | 31 | 64 | 77 | 80 | 81 | 80 | 82 | 82 | 82 | 21 | 13 | 10 | 8 | 8 | 7 | 6 | 5 |
| Nabutamone (M01AX01) | 100 | 100 | 100 | 100 | 100 | 100 | 100 | 100 | 100 | 100 | 100 | 100 | 100 | 100 | 100 | 100 | 100 | 100 | 100 | 100 | 100 |

aM01A except glucosamine (M01AX05). (-) Denotes no sales or no available data. COX: Cyclooxygenase; NSAID: non-steroidal anti-inflammatory drug

**Table S5:** Annual prevalence (%) of true NSAID use misclassified as apparent non-use based on primary care OTC use in Denmark, 1999–2019

|  | 1999 | 2000 | 2001 | 2002 | 2003 | 2004 | 2005 | 2006 | 2007 | 2008 | 2009 | 2010 | 2011 | 2012 | 2013 | 2014 | 2015 | 2016 | 2017 | 2018 | 2019 |
| --- | --- | --- | --- | --- | --- | --- | --- | --- | --- | --- | --- | --- | --- | --- | --- | --- | --- | --- | --- | --- | --- |
| **Aspirin (salicylates)** |  |  |  |  |  |  |  |  |  |  |  |  |  |  |  |  |  |  |  |  |  |
| Low-dose aspirin (B01AC06) | 2.68 | 2.68 | 2.08 | 1.70 | 1.34 | 1.14 | 1.01 | 0.87 | 0.82 | 0.85 | 0.85 | 0.76 | 0.75 | 0.64 | 0.68 | 0.64 | 0.60 | 0.55 | 0.52 | 0.55 | 0.58 |
| High-dose, alone (N02BA01) | 0.81 | 0.61 | 0.54 | 0.48 | 0.41 | 0.32 | 0.30 | 0.27 | 0.25 | 0.19 | 0.13 | 0.10 | 0.11 | 0.08 | 0.05 | 0.00 | 0.00 | - | - | - | - |
| High-dose, combinations (N02BA51) | - | - | 4.55 | 5.94 | 4.85 | 3.96 | 4.26 | 2.11 | 2.11 | 2.21 | 2.35 | 2.50 | 2.84 | 2.89 | 3.38 | 1.70 | 1.76 | 1.89 | 2.01 | 2.26 | 2.31 |
| **Non-aspirin NSAIDs** |  |  |  |  |  |  |  |  |  |  |  |  |  |  |  |  |  |  |  |  |  |
| Overall (M01Aa) | 2.45 | 2.62 | 2.65 | 2.69 | 2.75 | 2.70 | 2.93 | 3.05 | 3.10 | 3.18 | 3.25 | 3.46 | 3.81 | 4.31 | 4.17 | 2.64 | 2.87 | 2.92 | 2.99 | 3.12 | 3.38 |
| Butylpyrazolidines (M01AA) | 0.00 | 0.00 | 0.00 | 0.00 | 0.00 | 0.00 | 0.00 | 0.00 | 0.00 | 0.00 | 0.00 | 0.00 | 0.00 | 0.00 | 0.00 | 0.00 | 0.00 | 0.00 | 0.00 | 0.00 | 0.00 |
| Phenylbutazon (M01AA01) | 0.00 | 0.00 | 0.00 | 0.00 | 0.00 | 0.00 | 0.00 | 0.00 | 0.00 | 0.00 | 0.00 | 0.00 | 0.00 | 0.00 | 0.00 | 0.00 | 0.00 | 0.00 | 0.00 | 0.00 | 0.00 |
| Acetic Acids (M01AB) | 0.06 | 0.06 | 0.11 | 0.11 | 0.11 | 0.06 | 0.06 | 0.06 | 0.06 | 0.11 | 0.04 | 0.04 | 0.03 | 0.03 | 0.02 | 0.02 | 0.02 | 0.01 | 0.01 | 0.01 | 0.02 |
| Indometacine M01AB01 | 0.00 | 0.00 | 0.00 | 0.00 | 0.00 | 0.00 | 0.00 | 0.00 | 0.00 | 0.00 | 0.00 | 0.00 | 0.00 | 0.00 | 0.00 | 0.00 | 0.00 | 0.00 | - | - | - |
| Sulindac (M01AB02) | 0.00 | 0.00 | 0.00 | 0.00 | 0.00 | 0.00 | - | - | - | - | - | - | - | - | - | - | - | - | - | - | - |
| Tolmetin (M01AB03) | 0.00 | 0.00 | 0.00 | - | - | - | - | - | - | - | - | - | - | - | - | - | - | - | - | - | - |
| Diclofenac (M01AB05) | 0.08 | 0.08 | 0.08 | 0.08 | 0.08 | 0.08 | 0.09 | 0.08 | 0.08 | 0.13 | 0.06 | 0.03 | 0.03 | 0.02 | 0.02 | 0.01 | 0.01 | 0.01 | 0.01 | 0.01 | 0.01 |
| Etodolac (M01AB08) | 0.00 | 0.00 | 0.00 | 0.00 | 0.00 | 0.00 | 0.00 | 0.00 | 0.00 | 0.00 | 0.00 | 0.00 | 0.00 | 0.00 | 0.00 | 0.00 | 0.00 | 0.00 | 0.00 | 0.00 | 0.00 |
| Ketorolac (M01AB15) | 0.00 | 0.00 | 0.00 | 0.00 | 0.00 | 0.00 | 0.00 | 0.00 | 0.00 | 0.00 | 0.00 | 0.00 | 0.00 | 0.00 | 0.00 | 0.00 | 0.00 | 0.00 | 0.01 | 0.02 | 0.02 |
| Aceclofenac (M01AB16) | 0.00 | 0.00 | 0.00 | 0.00 | 0.00 | 0.00 | 0.00 | 0.00 | - | - | - | - | - | - | - | - | - | - | - | - | - |
| Diclofenac, combinations (M01AB55) | 0.01 | 0.01 | 0.00 | 0.00 | 0.00 | 0.00 | 0.00 | 0.01 | 0.01 | 0.00 | 0.00 | 0.00 | 0.00 | 0.00 | 0.00 | 0.00 | 0.00 | 0.00 | 0.00 | 0.00 | 0.00 |
| Enolic acids (M01AC) | 0.02 | 0.01 | 0.01 | 0.01 | 0.01 | 0.01 | 0.01 | 0.01 | 0.01 | 0.00 | 0.00 | 0.00 | 0.00 | 0.00 | 0.00 | 0.00 | 0.00 | 0.00 | 0.00 | 0.00 | 0.00 |
| Piroxicam (M01AC01) | 0.01 | 0.01 | 0.01 | 0.01 | 0.01 | 0.01 | 0.01 | 0.01 | 0.00 | 0.00 | 0.00 | 0.00 | 0.00 | 0.00 | 0.00 | 0.00 | 0.00 | 0.00 | 0.00 | 0.00 | 0.00 |
| Tenoxicam (M01AC02) | 0.00 | 0.00 | 0.00 | 0.00 | 0.00 | 0.00 | 0.00 | 0.00 | 0.00 | 0.00 | 0.00 | 0.00 | 0.00 | 0.00 | 0.00 | 0.00 | 0.00 | 0.00 | 0.00 | 0.00 | 0.00 |
| Lornoxicam (M01AC05) | 0.00 | 0.01 | 0.00 | 0.00 | 0.00 | 0.00 | 0.01 | 0.01 | 0.01 | 0.00 | 0.00 | 0.00 | 0.00 | 0.00 | 0.00 | 0.00 | 0.00 | 0.00 | 0.00 | 0.00 | 0.00 |
| Meloxicam (M01AC06) | 0.00 | 0.00 | 0.00 | 0.00 | 0.00 | 0.00 | 0.00 | 0.00 | 0.00 | 0.00 | 0.00 | 0.00 | 0.00 | 0.00 | 0.00 | 0.00 | 0.00 | 0.00 | 0.00 | 0.00 | 0.00 |
| Propionic acids (M01AE) | 2.48 | 2.73 | 2.96 | 3.26 | 3.54 | 3.78 | 3.81 | 3.83 | 3.82 | 3.92 | 3.96 | 4.23 | 4.69 | 4.88 | 4.72 | 2.94 | 3.18 | 2.99 | 3.19 | 3.23 | 3.40 |
| Ibuprofen (M01AE01) | 2.79 | 3.09 | 3.26 | 3.64 | 3.83 | 4.11 | 3.99 | 4.03 | 4.02 | 4.12 | 4.31 | 4.44 | 4.92 | 5.12 | 4.97 | 3.09 | 3.34 | 3.34 | 3.32 | 3.51 | 3.69 |
| Naproxen (M01AE02) | 0.01 | 0.02 | 0.02 | 0.01 | 0.02 | 0.01 | 0.01 | 0.01 | 0.01 | 0.01 | 0.01 | 0.01 | 0.01 | 0.01 | 0.01 | 0.01 | 0.01 | 0.01 | 0.01 | 0.01 | 0.01 |
| Ketoprofen (M01AE03) | 0.00 | 0.00 | 0.00 | 0.00 | 0.00 | 0.00 | 0.00 | 0.00 | 0.00 | 0.00 | 0.00 | 0.00 | 0.00 | 0.00 | - | - | - | - | - | - | - |
| Fenoprofen (M01AE04) | 0.00 | 0.00 | 0.00 | 0.00 | 0.00 | - | - | - | - | - | - | - | - | - | - | - | - | - | - | - | - |
| Fenbufen (M01AE05) | 0.00 | 0.00 | - | - | - | - | - | - | - | - | - | - | - | - | - | - | - | - | - | - | - |
| Flurbiprofen (M01AE09) | 0.00 | 0.00 | 0.00 | 0.00 | 0.00 | 0.00 | 0.00 | 0.00 | 0.00 | 0.00 | 0.00 | 0.00 | - | - | - | - | - | - | - | - | - |
| Tiaprofenic acid (M01AE11) | 0.00 | 0.00 | 0.00 | 0.00 | 0.00 | 0.00 | 0.00 | 0.00 | 0.00 | 0.00 | 0.00 | 0.00 | 0.00 | 0.00 | 0.00 | 0.00 | 0.00 | 0.00 | 0.00 | 0.00 | 0.00 |
| Dexibuprofen (M01AE14) | - | - | 0.00 | 0.00 | 0.00 | 0.00 | 0.00 | 0.00 | 0.00 | 0.01 | 0.01 | 0.00 | 0.00 | 0.00 | 0.00 | 0.00 | 0.00 | 0.00 | 0.00 | 0.00 | 0.00 |
| Dexketoprofen (M01AE17) | - | - | - | - | - | 0.00 | 0.00 | 0.00 | 0.00 | 0.00 | 0.00 | 0.00 | 0.00 | 0.00 | 0.00 | 0.00 | 0.00 | 0.00 | 0.00 | 0.00 | 0.00 |
| Ibuprofen, combinations (M01AE51) | - | - | - | - | - | - | - | - | - | - | - | - | - | - | - | - | - | - | - | - | 0.00 |
| Naproxen + esomeprazol (M01AE52) | - | - | - | - | - | - | - | - | - | - | - | - | - | 0.00 | 0.00 | 0.00 | 0.00 | 0.00 | - | - | - |
| Fenematic acids (M01AG) | 0.00 | 0.00 | 0.00 | 0.00 | 0.00 | 0.00 | 0.00 | 0.00 | 0.00 | 0.00 | 0.00 | 0.00 | 0.00 | 0.00 | 0.00 | 0.00 | 0.00 | 0.00 | 0.00 | 0.00 | 0.00 |
| Tolfenamic acid (M01AG02) | 0.00 | 0.00 | 0.00 | 0.00 | 0.00 | 0.00 | 0.00 | 0.00 | 0.00 | 0.00 | 0.00 | 0.00 | 0.00 | 0.00 | 0.00 | 0.00 | 0.00 | 0.00 | 0.00 | 0.00 | 0.00 |
| Coxibs (M01AH) | 0.00 | 0.00 | 0.02 | 0.03 | 0.02 | 0.02 | 0.00 | 0.00 | 0.01 | 0.00 | 0.00 | 0.00 | 0.00 | 0.00 | 0.00 | 0.00 | 0.00 | 0.00 | 0.00 | 0.00 | 0.00 |
| Celecoxib (M01AH01) | - | 0.00 | 0.00 | 0.00 | 0.01 | 0.00 | 0.00 | 0.00 | 0.01 | 0.00 | 0.00 | 0.00 | 0.00 | 0.00 | 0.00 | 0.00 | 0.00 | 0.00 | 0.00 | 0.00 | 0.00 |
| Rofecoxib (M01AH02) | 0.00 | 0.00 | 0.01 | 0.01 | 0.02 | 0.01 | - | - | - | - | - | - | - | - | - | - | - | - | - | - | - |
| Parecoxib (M01AH04) | - | - | - | - | 0.00 | - | - | - | - | - | - | - | - | - | - | - | - | - | - | - | - |
| Etoricoxib (M01AH05) | - | - | - | - | 0.00 | 0.00 | 0.00 | 0.00 | 0.00 | 0.00 | 0.00 | 0.00 | 0.00 | 0.00 | 0.00 | 0.00 | 0.00 | 0.00 | 0.00 | 0.00 | 0.00 |
| Lumiracoxib (M01AH06) | - | - | - | - | - | - | - | - | - | - | - | - | - | - | - | - | - | - | - | - | - |
| Nonacidics (M01AX) | 0.00 | 0.00 | 0.00 | 0.00 | 1.01 | 1.92 | 0.93 | 0.69 | 0.56 | 0.59 | 0.56 | 0.57 | 0.51 | 1.58 | 1.56 | 1.61 | 1.70 | 1.48 | 1.42 | 1.44 | 1.43 |
| Nabutamone (M01AX01) | 0.00 | 0.00 | 0.00 | 0.00 | 0.00 | 0.00 | 0.00 | 0.00 | 0.00 | 0.00 | 0.00 | 0.00 | 0.00 | 0.00 | 0.00 | 0.00 | 0.00 | 0.00 | 0.00 | 0.00 | 0.00 |

aM01A except glucosamine (M01AX05). (-) Denotes no sales or no available data. COX: Cyclooxygenase; NSAID: non-steroidal anti-inflammatory drug.

**Table S6:** Annual prevalence (%) of true NSAID use misclassified as non-use from hospital and primary sector non-prescription use in Denmark, 1999–2019

|  | 1999 | 2000 | 2001 | 2002 | 2003 | 2004 | 2005 | 2006 | 2007 | 2008 | 2009 | 2010 | 2011 | 2012 | 2013 | 2014 | 2015 | 2016 | 2017 | 2018 | 2019 |
| --- | --- | --- | --- | --- | --- | --- | --- | --- | --- | --- | --- | --- | --- | --- | --- | --- | --- | --- | --- | --- | --- |
| **Aspirin (salicylates)** |  |  |  |  |  |  |  |  |  |  |  |  |  |  |  |  |  |  |  |  |  |
| Low-dose aspirin (B01AC06) | 2.78 | 2.78 | 2.18 | 1.80 | 1.44 | 1.24 | 1.11 | 0.97 | 0.92 | 0.95 | 0.95 | 0.86 | 0.84 | 0.73 | 0.77 | 0.73 | 0.67 | 0.63 | 0.60 | 0.63 | 0.66 |
| High-dose, alone (N02BA01) | 0.82 | 0.62 | 0.55 | 0.49 | 0.42 | 0.33 | 0.31 | 0.28 | 0.26 | 0.19 | 0.13 | 0.10 | 0.11 | 0.08 | 0.05 | 0.00 | 0.00 | 0.00 | 0.00 | 0.00 | 0.00 |
| High-dose, combinations (N02BA51) | 0.00 | 0.00 | 4.55 | 5.94 | 4.85 | 3.96 | 4.26 | 2.11 | 2.11 | 2.21 | 2.35 | 2.50 | 2.84 | 2.89 | 3.39 | 1.70 | 1.76 | 1.89 | 2.01 | 2.26 | 2.31 |
| **Non-aspirin NSAIDs** |  |  |  |  |  |  |  |  |  |  |  |  |  |  |  |  |  |  |  |  |  |
| Overall (M01Aa) | 2.90 | 3.12 | 3.19 | 3.26 | 3.30 | 3.21 | 3.44 | 3.55 | 3.59 | 3.67 | 3.72 | 3.91 | 4.24 | 4.73 | 4.59 | 3.11 | 3.31 | 3.34 | 3.40 | 3.51 | 3.79 |
| Butylpyrazolidines (M01AA) | 0.00 | 0.00 | 0.00 | 0.00 | 0.00 | 0.00 | 0.00 | 0.00 | 0.00 | 0.00 | 0.00 | 0.00 | 0.00 | 0.00 | 0.00 | 0.00 | 0.00 | 0.00 | 0.00 | 0.00 | 0.00 |
| Phenylbutazon (M01AA01) | 0.00 | 0.00 | 0.00 | 0.00 | 0.00 | 0.00 | 0.00 | 0.00 | 0.00 | 0.00 | 0.00 | 0.00 | 0.00 | 0.00 | 0.00 | 0.00 | 0.00 | 0.00 | 0.00 | 0.00 | 0.00 |
| Acetic Acids (M01AB) | 0.25 | 0.27 | 0.32 | 0.32 | 0.31 | 0.27 | 0.27 | 0.26 | 0.26 | 0.30 | 0.16 | 0.13 | 0.10 | 0.08 | 0.07 | 0.07 | 0.06 | 0.06 | 0.06 | 0.06 | 0.08 |
| Indometacine M01AB01 | 0.01 | 0.02 | 0.01 | 0.01 | 0.01 | 0.01 | 0.01 | 0.01 | 0.01 | 0.00 | 0.01 | 0.00 | 0.00 | 0.00 | 0.00 | 0.00 | 0.00 | 0.00 | 0.00 | 0.00 | 0.00 |
| Sulindac (M01AB02) | 0.00 | 0.00 | 0.00 | 0.00 | 0.00 | 0.00 | 0.00 | 0.00 | 0.00 | 0.00 | 0.00 | 0.00 | 0.00 | 0.00 | 0.00 | 0.00 | 0.00 | 0.00 | 0.00 | 0.00 | 0.00 |
| Tolmetin (M01AB03) | 0.00 | 0.00 | 0.00 | 0.00 | 0.00 | 0.00 | 0.00 | 0.00 | 0.00 | 0.00 | 0.00 | 0.00 | 0.00 | 0.00 | 0.00 | 0.00 | 0.00 | 0.00 | 0.00 | 0.00 | 0.00 |
| Diclofenac (M01AB05) | 0.23 | 0.26 | 0.26 | 0.25 | 0.25 | 0.26 | 0.28 | 0.28 | 0.27 | 0.31 | 0.16 | 0.10 | 0.08 | 0.06 | 0.05 | 0.05 | 0.04 | 0.04 | 0.04 | 0.04 | 0.04 |
| Etodolac (M01AB08) | 0.01 | 0.01 | 0.01 | 0.01 | 0.02 | 0.02 | 0.01 | 0.01 | 0.01 | 0.01 | 0.01 | 0.01 | 0.00 | 0.00 | 0.00 | 0.00 | 0.00 | 0.00 | 0.00 | 0.00 | 0.00 |
| Ketorolac (M01AB15) | 0.00 | 0.00 | 0.00 | 0.00 | 0.00 | 0.00 | 0.00 | 0.00 | 0.00 | 0.00 | 0.00 | 0.00 | 0.00 | 0.00 | 0.00 | 0.00 | 0.00 | 0.00 | 0.03 | 0.04 | 0.03 |
| Aceclofenac (M01AB16) | 0.00 | 0.00 | 0.00 | 0.00 | 0.00 | 0.00 | 0.00 | 0.00 | 0.00 | 0.00 | 0.00 | 0.00 | 0.00 | 0.00 | 0.00 | 0.00 | 0.00 | 0.00 | 0.00 | 0.00 | 0.00 |
| Diclofenac, combinations (M01AB55) | 0.04 | 0.03 | 0.02 | 0.01 | 0.01 | 0.01 | 0.01 | 0.02 | 0.02 | 0.01 | 0.00 | 0.00 | 0.00 | 0.00 | 0.00 | 0.00 | 0.00 | 0.00 | 0.00 | 0.00 | 0.00 |
| Enolic acids (M01AC) | 0.06 | 0.05 | 0.06 | 0.05 | 0.04 | 0.04 | 0.04 | 0.03 | 0.02 | 0.02 | 0.02 | 0.01 | 0.01 | 0.00 | 0.00 | 0.00 | 0.00 | 0.00 | 0.00 | 0.00 | 0.00 |
| Piroxicam (M01AC01) | 0.03 | 0.03 | 0.03 | 0.02 | 0.02 | 0.01 | 0.01 | 0.01 | 0.00 | 0.00 | 0.00 | 0.00 | 0.00 | 0.00 | 0.00 | 0.00 | 0.00 | 0.00 | 0.00 | 0.00 | 0.00 |
| Tenoxicam (M01AC02) | 0.01 | 0.01 | 0.00 | 0.00 | 0.00 | 0.00 | 0.00 | 0.00 | 0.00 | 0.00 | 0.00 | 0.00 | 0.00 | 0.00 | 0.00 | 0.00 | 0.00 | 0.00 | 0.00 | 0.00 | 0.00 |
| Lornoxicam (M01AC05) | 0.01 | 0.02 | 0.02 | 0.02 | 0.02 | 0.02 | 0.03 | 0.04 | 0.03 | 0.02 | 0.02 | 0.02 | 0.01 | 0.00 | 0.00 | 0.00 | 0.00 | 0.00 | 0.00 | 0.00 | 0.00 |
| Meloxicam (M01AC06) | 0.00 | 0.00 | 0.00 | 0.00 | 0.00 | 0.00 | 0.00 | 0.00 | 0.00 | 0.00 | 0.00 | 0.00 | 0.00 | 0.00 | 0.00 | 0.00 | 0.00 | 0.00 | 0.00 | 0.00 | 0.00 |
| Propionic acids (M01AE) | 2.73 | 3.00 | 3.24 | 3.54 | 3.84 | 4.09 | 4.15 | 4.15 | 4.13 | 4.25 | 4.34 | 4.63 | 5.08 | 5.26 | 5.11 | 3.36 | 3.58 | 3.35 | 3.54 | 3.55 | 3.72 |
| Ibuprofen (M01AE01) | 3.01 | 3.33 | 3.50 | 3.88 | 4.09 | 4.39 | 4.29 | 4.33 | 4.31 | 4.42 | 4.68 | 4.81 | 5.29 | 5.48 | 5.34 | 3.51 | 3.72 | 3.68 | 3.66 | 3.83 | 4.02 |
| Naproxen (M01AE02) | 0.04 | 0.05 | 0.05 | 0.03 | 0.04 | 0.04 | 0.03 | 0.03 | 0.03 | 0.03 | 0.04 | 0.04 | 0.03 | 0.04 | 0.03 | 0.03 | 0.04 | 0.04 | 0.03 | 0.03 | 0.03 |
| Ketoprofen (M01AE03) | 0.01 | 0.01 | 0.01 | 0.01 | 0.01 | 0.01 | 0.01 | 0.01 | 0.01 | 0.00 | 0.00 | 0.00 | 0.00 | 0.00 | 0.00 | 0.00 | 0.00 | 0.00 | 0.00 | 0.00 | 0.00 |
| Fenoprofen (M01AE04) | 0.00 | 0.00 | 0.00 | 0.00 | 0.00 | 0.00 | 0.00 | 0.00 | 0.00 | 0.00 | 0.00 | 0.00 | 0.00 | 0.00 | 0.00 | 0.00 | 0.00 | 0.00 | 0.00 | 0.00 | 0.00 |
| Fenbufen (M01AE05) | 0.00 | 0.00 | 0.00 | 0.00 | 0.00 | 0.00 | 0.00 | 0.00 | 0.00 | 0.00 | 0.00 | 0.00 | 0.00 | 0.00 | 0.00 | 0.00 | 0.00 | 0.00 | 0.00 | 0.00 | 0.00 |
| Flurbiprofen (M01AE09) | 0.00 | 0.00 | 0.00 | 0.00 | 0.00 | 0.00 | 0.00 | 0.00 | 0.00 | 0.00 | 0.00 | 0.00 | 0.00 | 0.00 | 0.00 | 0.00 | 0.00 | 0.00 | 0.00 | 0.00 | 0.00 |
| Tiaprofenic acid (M01AE11) | 0.00 | 0.00 | 0.00 | 0.00 | 0.00 | 0.00 | 0.00 | 0.00 | 0.00 | 0.00 | 0.00 | 0.00 | 0.00 | 0.00 | 0.00 | 0.00 | 0.00 | 0.00 | 0.00 | 0.00 | 0.00 |
| Dexibuprofen (M01AE14) | 0.00 | 0.00 | 0.00 | 0.00 | 0.00 | 0.00 | 0.00 | 0.00 | 0.00 | 0.01 | 0.01 | 0.01 | 0.00 | 0.00 | 0.00 | 0.00 | 0.00 | 0.00 | 0.00 | 0.00 | 0.00 |
| Dexketoprofen (M01AE17) | 0.00 | 0.00 | 0.00 | 0.00 | 0.00 | 0.00 | 0.00 | 0.00 | 0.00 | 0.00 | 0.00 | 0.00 | 0.00 | 0.00 | 0.00 | 0.00 | 0.00 | 0.00 | 0.00 | 0.00 | 0.00 |
| Ibuprofen, combinations (M01AE51) | 0.00 | 0.00 | 0.00 | 0.00 | 0.00 | 0.00 | 0.00 | 0.00 | 0.00 | 0.00 | 0.00 | 0.00 | 0.00 | 0.00 | 0.00 | 0.00 | 0.00 | 0.00 | 0.00 | 0.00 | 0.00 |
| Naproxen + esomeprazol (M01AE52) | 0.00 | 0.00 | 0.00 | 0.00 | 0.00 | 0.00 | 0.00 | 0.00 | 0.00 | 0.00 | 0.00 | 0.00 | 0.00 | 0.00 | 0.00 | 0.00 | 0.00 | 0.00 | 0.00 | 0.00 | 0.00 |
| Fenematic acids (M01AG) | 0.00 | 0.00 | 0.00 | 0.01 | 0.00 | 0.00 | 0.00 | 0.00 | 0.00 | 0.00 | 0.00 | 0.00 | 0.00 | 0.00 | 0.00 | 0.00 | 0.00 | 0.00 | 0.00 | 0.00 | 0.00 |
| Tolfenamic acid (M01AG02) | 0.00 | 0.00 | 0.00 | 0.01 | 0.00 | 0.00 | 0.00 | 0.00 | 0.00 | 0.00 | 0.00 | 0.00 | 0.00 | 0.00 | 0.00 | 0.00 | 0.00 | 0.00 | 0.00 | 0.00 | 0.00 |
| Coxibs (M01AH) | 0.00 | 0.03 | 0.09 | 0.12 | 0.11 | 0.08 | 0.02 | 0.01 | 0.02 | 0.01 | 0.01 | 0.01 | 0.01 | 0.01 | 0.01 | 0.01 | 0.01 | 0.01 | 0.01 | 0.01 | 0.01 |
| Celecoxib (M01AH01) | 0.00 | 0.01 | 0.04 | 0.04 | 0.06 | 0.04 | 0.01 | 0.01 | 0.01 | 0.01 | 0.00 | 0.00 | 0.01 | 0.01 | 0.01 | 0.01 | 0.01 | 0.01 | 0.01 | 0.01 | 0.01 |
| Rofecoxib (M01AH02) | 0.00 | 0.02 | 0.05 | 0.07 | 0.06 | 0.02 | 0.00 | 0.00 | 0.00 | 0.00 | 0.00 | 0.00 | 0.00 | 0.00 | 0.00 | 0.00 | 0.00 | 0.00 | 0.00 | 0.00 | 0.00 |
| Parecoxib (M01AH04) | 0.00 | 0.00 | 0.00 | 0.00 | 0.00 | 0.00 | 0.00 | 0.00 | 0.00 | 0.00 | 0.00 | 0.00 | 0.00 | 0.00 | 0.00 | 0.00 | 0.00 | 0.00 | 0.00 | 0.00 | 0.00 |
| Etoricoxib (M01AH05) | 0.00 | 0.00 | 0.00 | 0.00 | 0.00 | 0.00 | 0.00 | 0.00 | 0.00 | 0.00 | 0.00 | 0.00 | 0.00 | 0.00 | 0.00 | 0.00 | 0.00 | 0.00 | 0.00 | 0.00 | 0.00 |
| Lumiracoxib (M01AH06) | 0.00 | 0.00 | 0.00 | 0.00 | 0.00 | 0.00 | 0.00 | 0.00 | 0.00 | 0.00 | 0.00 | 0.00 | 0.00 | 0.00 | 0.00 | 0.00 | 0.00 | 0.00 | 0.00 | 0.00 | 0.00 |
| Nonacidics (M01AX) | 0.00 | 0.00 | 0.00 | 0.00 | 1.01 | 1.92 | 0.93 | 0.69 | 0.57 | 0.59 | 0.57 | 0.57 | 0.51 | 1.59 | 1.56 | 1.61 | 1.70 | 1.48 | 1.42 | 1.44 | 1.43 |
| Nabutamone (M01AX01) | 0.00 | 0.00 | 0.00 | 0.00 | 0.00 | 0.00 | 0.00 | 0.00 | 0.00 | 0.00 | 0.00 | 0.00 | 0.00 | 0.00 | 0.00 | 0.00 | 0.00 | 0.00 | 0.00 | 0.00 | 0.00 |

aM01A except glucosamine (M01AX05). (-) Denotes no sale
